# Supplementary material
Source: publisher figshare collection journal article supplement (https://frontiersin.figshare.com/ndownloader/files/18002831)
Supplement: Supplementary file 1 [file 18002831]

## Sheet: Tabla S1 - Frontiers19
Plot number	Elevation (m)	Longitude	Latitude	Aa argyrolepis Rchb. f.	Aa colombiana Schltr.	Aa maderoi Schltr.	Aa paleacea (Kunth) Rchb.f.	Acaena cylindristachya Ruiz & Pav.	Acaena elongata L.	Acaena ovalifolia Ruiz & Pav.	Acaulimalva purdiaei (A.Gray) Krapov.	Achyrocline alata (Kunth) DC.	Achyrocline hallii Hieron.	Achyrocline lehmannii Hieron.	Achyrocline ramosissima Britton	Achyrocline satureioides (Lam.) DC.	Achyrocline trianae Klatt	Aciachne acicularis Laegaard	Aciachne flagellifera Laegaard	Aciachne pulvinata Benth.	Aegopogon cenchroides Humb. & Bonpl. ex Willd.	Aetheolaena caldasensis (Cuatrec.) B.Nord.	Aetheolaena involucrata (Kunth) B. Nord.	Aetheolaena lingulata (Schltdl.) B. Nord.	Aetheolaena otophora (Wedd.) B. Nord.	Aetheolaena patens (Kunth) B. Nord.	Aetheolaena pichinchensis (Cuatrec.) B. Nord.	Ageratina fastigiata (Kunth) R.M.King & H.Rob.	Ageratina glechonophylla (Less.) R.M.King & H.Rob.	Ageratina glyptophlebia (B.L.Rob.) R.M.King & H.Rob.	Ageratina gracilis (Kunth) R.M.King & H.Rob.	Ageratina gynoxoides (Wedd.) R.M.King & H.Rob.	Ageratina jahnii (B.L.Rob.) R.M.King & H.Rob.	Ageratina pichinchensis (Kunth) R.M.King & H.Rob.	Ageratina pseudochilca (Benth.) R.M. King & H. Rob.	Ageratina scopulorum (Wedd.) R. M. King & H. Rob.	Ageratina sodiroi (Hieron.) R.M. King & H. Rob.	Ageratina theifolia (Benth.) R.M.King & H.Rob.	Ageratina tinifolia (Kunth) R.M.King & H.Rob.	Ageratina vacciniifolia (Benth.) R.M.King & H.Rob.	Agrostis araucana Phil.	Agrostis breviculmis Hitchc.	Agrostis foliata Hook.f.	Agrostis ghiesbreghtii E. Fourn.	Agrostis mertensii Trin.	Agrostis perennans (Walter) Tuck.	Agrostis tolucensis Kunth	Agrostis trichodes (Kunth) Roem. & Schult.	Aira caryophyllea L.
A.P00001	3650	-74.2748	4.04826						1
A.P00002	3600	-74.2838	4.04827						1
A.P00003	3700	-74.2658	4.04825					1
A.P00004	3925	-74.2478	4.04824
A.P00005	3950	-74.2478	4.04824																																													1
A.P00006	3825	-74.2568	4.04824					1																																								1
A.P00007	4025	-74.2298	4.04822
A.P00008	4000	-72.3281	6.53835					1	1																																							1
A.P00009	4000	-72.3281	6.53835
A.P00010	4050	-72.3281	6.53835
A.P00011	4100	-72.3281	6.53835
A.P00012	4060	-72.3281	6.53835
A.P00013	4100	-72.3281	6.53835
A.P00014	4000	-72.3281	6.53835																	1
A.P00015	4100	-72.3281	6.53835
A.P00016	4150	-72.3281	6.53835
A.P00017	4000	-72.3281	6.53835					1
A.P00018	4040	-72.3281	6.53835					1
A.P00020	3900	-72.3281	6.53835
A.P00021	4010	-72.3281	6.53835					1												1
A.P00022	4100	-72.3281	6.53835
A.P00026	4250	-75.3653	4.8446																																						1
A.P00027	4475	-75.3562	4.8446																																						1
A.P00028	4300	-75.3653	4.8446
A.P00029	4350	-75.3653	4.8446
A.P00030	4350	-75.3653	4.8446
A.P00031	4150	-75.3472	4.82651
A.P00032	3850	-75.3472	4.82651
A.P00033	4100	-75.3472	4.82651						1
A.P00034	4125	-75.3472	4.82651
A.P00035	4315	-75.3472	4.82651
A.P00036	3600	-76.1472	2.88998
A.P00037	3800	-76.1472	2.89903
A.P00038	3800	-76.1472	2.89903
A.P00039	3700	-76.1472	2.89903
A.P00040	3750	-76.1472	2.89903
A.P00041	3500	-76.1382	2.88999
A.P00042	3700	-73.6149	10.667																												1
A.P00043	3800	-73.6149	10.667					1																																							1
A.P00044	3850	-73.6149	10.667
A.P00045	3400	-73.606	10.6308					1
A.P00046	3600	-73.6059	10.6398																												1
A.P00047	3300	-73.606	10.6308					1
A.P00048	3500	-73.5968	10.6398																												1
A.P00279	3750	-77.8792	0.682183
A.P00280	3750	-77.8792	0.682183
A.P00281	3750	-77.8792	0.682183
A.P00282	3750	-77.8792	0.682183
A.P00283	3750	-77.8792	0.682183
A.P00284	3850	-77.8882	0.682178
A.P00285	3850	-77.8882	0.682178
A.P00286	3850	-77.8882	0.682178
A.P00287	3850	-77.8882	0.682178
A.P00288	3850	-77.8882	0.682178
A.P00289	3430	-77.8882	0.655071
A.P00290	3430	-77.8882	0.655071
A.P00291	3430	-77.8882	0.655071
A.P00292	3570	-77.8882	0.655071
A.P00293	3570	-77.8882	0.655071
A.P00294	3430	-77.8882	0.655071
A.P00295	3430	-77.8882	0.655071
A.P00296	3430	-77.8882	0.655071
A.P00297	3430	-77.8882	0.655071
A.P00298	3570	-77.8882	0.655071
A.P00299	3570	-77.8882	0.655071
A.P00300	3600	-77.8882	0.664107
A.P00301	3550	-77.8882	0.655071
A.P00302	3500	-77.8882	0.655071
A.P00303	3570	-77.8882	0.655071
A.P00304	3800	-77.6817	0.600962
A.P00305	3850	-77.6727	0.600966
A.P00306	3750	-77.6907	0.609995
A.P00307	3700	-77.6907	0.609995
A.P00308	3700	-77.6907	0.609995
A.P00309	3700	-77.6907	0.609995
A.P00310	3700	-77.6907	0.609995
A.P00311	3700	-77.6907	0.609995
A.P00312	3700	-77.6907	0.609995
A.P00313	3800	-77.6817	0.600962
A.P00314	3800	-77.6817	0.600962
A.P00315	3800	-77.6817	0.600962
A.P00316	3800	-77.6817	0.600962
A.P00317	3750	-77.6907	0.609995
A.P00318	3750	-77.6907	0.609995
A.P00319	3750	-77.6907	0.609995
A.P00320	3750	-77.6907	0.609995
A.P00321	3650	-77.6907	0.609995
A.P00322	3510	-77.8882	0.655071
A.P00323	3800	-77.6817	0.600962
A.P00324	3900	-77.6637	0.600971
A.P00325	3850	-77.6727	0.600966
A.P00326	3900	-77.6637	0.600971
A.P00327	3900	-77.6637	0.600971
A.P00328	3900	-77.6637	0.600971
A.P00329	3900	-77.6637	0.600971
A.P00330	3700	-77.8882	0.664107
A.P00331	3800	-77.8882	0.682178
A.P00332	3800	-77.8882	0.682178
A.P00333	3650	-77.8882	0.664107
A.P00334	3650	-77.8882	0.664107
A.P00335	3950	-77.8882	0.682178
A.P00336	4000	-77.6637	0.600971
A.P00337	4000	-77.6637	0.600971
A.P00338	3950	-77.6637	0.600971
A.P00339	4000	-77.6637	0.600971
A.P00340	4000	-77.6637	0.600971
A.P00341	4000	-77.6637	0.600971
A.P00342	4000	-77.6637	0.600971
A.P00343	3550	-77.6997	0.60999
A.P00344	3550	-77.6997	0.60999
A.P00345	3550	-77.6997	0.60999
A.P00346	3550	-77.6997	0.60999
A.P00347	3550	-77.6997	0.60999
A.P00348	3550	-77.6997	0.60999
A.P00349	3550	-77.6997	0.60999
A.P00350	3550	-77.6997	0.60999
A.P00351	3600	-76.0897	6.45379
A.P00352	3650	-76.1078	6.47184
A.P00355	3950	-76.1168	6.45373									1
A.P00356	3700	-76.1169	6.46277									1
A.P00357	3870	-76.1078	6.46279									1
A.P00358	3550	-76.1168	6.45373									1
A.P00359	3600	-76.0897	6.45379
A.P00360	3600	-76.0897	6.45379
A.P00361	3500	-76.0897	6.47188
A.P00362	3600	-76.0897	6.45379
A.P00363	3650	-76.0897	6.45379
A.P00364	3900	-76.1168	6.45373
A.P00365	3600	-76.0897	6.45379
A.P00366	3600	-76.0897	6.45379
A.P00367	3620	-76.1078	6.47184
A.P00368	3950	-76.1168	6.45373
A.P00369	3580	-76.0897	6.45379
A.P00370	3600	-76.0897	6.45379
A.P00371	3600	-76.0897	6.45379
A.P00372	3550	-76.1078	6.45375
A.P00373	3550	-76.0807	6.45381
A.P00374	3550	-76.0807	6.45381
A.P00375	3550	-76.0807	6.45381
A.P00376	3550	-76.1078	6.45375
A.P00377	3550	-76.0988	6.47186
A.P00378	3550	-76.0988	6.47186
A.P00379	3540	-76.1078	6.45375
A.P00380	3600	-76.0897	6.45379
A.P00381	3580	-76.1078	6.45375
A.P00382	3580	-76.1078	6.45375
A.P00383	3550	-76.0897	6.47188
A.P00384	3550	-76.0988	6.47186
A.P00385	3600	-76.0897	6.45379
A.P00386	3550	-76.0806	6.44476
A.P00387	3600	-76.0897	6.45379
A.P00388	3500	-76.0897	6.44474
A.P00389	3600	-76.0897	6.45379
A.P00390	3600	-76.0897	6.45379
A.P00391	3600	-76.0897	6.45379
A.P00392	3600	-76.0897	6.45379
A.P00393	3530	-76.0807	6.45381
A.P00394	3530	-76.0807	6.45381
A.P00395	3500	-76.0897	6.44474
A.P00396	3550	-76.0988	6.47186
A.P00397	3550	-76.0988	6.47186
A.P00398	3550	-76.0988	6.47186
A.P00399	3550	-76.0897	6.44474
A.P00400	3600	-76.1078	6.47184
A.P00402	3500	-76.0897	6.44474																																											1
A.P00403	3550	-76.0807	6.45381
A.P00405	3600	-76.0897	6.45379
A.P00406	3600	-76.1078	6.47184
A.P00407	3600	-76.0897	6.45379
A.P00408	3550	-76.0988	6.47186
A.P00410	3550	-76.0807	6.45381
A.P00411	3650	-76.0897	6.45379
A.P00412	3600	-76.0897	6.45379
A.P00413	3550	-76.0807	6.45381
A.P00415	4200	-77.3499	1.21581						1																																1
A.P00416	4250	-77.3499	1.21581																																						1
A.P00417	4250	-77.3499	1.21581
A.P00418	4200	-77.3499	1.21581																																						1
A.P00419	4200	-77.3499	1.21581
A.P00420	4100	-77.3499	1.21581																																						1
A.P00421	4100	-77.3499	1.21581																																						1
A.P00422	4050	-77.3499	1.21581																																						1
A.P00423	4050	-77.3499	1.21581																																						1
A.P00424	4050	-77.3499	1.21581
A.P00425	4050	-77.3499	1.21581
A.P00426	4050	-77.3499	1.21581
A.P00427	4050	-77.3499	1.21581
A.P00428	4050	-77.3499	1.21581
A.P00430	3580	-77.7179	1.07087
A.P00431	3920	-77.7179	1.07991
A.P00432	3960	-77.7179	1.07991																						1
A.P00433	3900	-77.7179	1.07991
A.P00434	4260	-77.9242	0.817687																																						1
A.P00435	4300	-77.9242	0.817687
A.P00436	4100	-77.9242	0.826723																																						1
A.P00437	4100	-77.9242	0.826723																																						1
A.P00438	4190	-77.9242	0.826723																																						1
A.P00439	4100	-77.9242	0.826723
A.P00440	4200	-77.9242	0.817687
A.P00441	3800	-77.9242	0.835758
A.P00442	4000	-77.9242	0.835758
A.P00443	4010	-77.9242	0.835758
A.P00444	4010	-77.9242	0.835758																																						1
A.P00445	4050	-77.9242	0.826723																																						1
A.P00446	4080	-77.9242	0.826723																																						1
A.P00447	4090	-77.9242	0.826723
A.P00448	4100	-77.9242	0.826723																																						1
A.P00450	3550	-77.3409	1.22486
A.P00451	3810	-77.3409	1.22486
A.P00452	3800	-77.3409	1.22486
A.P00453	3700	-77.3409	1.22486
A.P00455	3650	-77.7179	1.07087
A.P00456	3660	-77.7179	1.07087
A.P00457	3720	-77.7179	1.07991
A.P00458	3820	-77.7179	1.07991
A.P00459	3800	-77.7179	1.07991
A.P00460	3600	-77.7179	1.07087
A.P00461	3700	-77.7179	1.07087
A.P00465	3520	-77.7179	1.07087
A.P00466	3200	-77.1073	1.1708
A.P00467	3200	-77.1073	1.1708
A.P00468	3200	-77.1073	1.1708
A.P00472	3520	-77.7179	1.07087						1
A.P00473	3540	-77.7179	1.07087
A.P00475	3500	-77.7179	1.07087
A.P00530	3200	-73.7426	4.49984
A.P00531	3300	-73.7426	4.49984
A.P00532	3500	-73.7426	4.49984
A.P00533	3600	-73.7426	4.49984
A.P00534	3700	-73.7426	4.49984
A.P00535	3800	-73.7426	4.49984
A.P00536	3750	-73.7426	4.49984
A.P00537	3650	-73.7426	4.49984
A.P00538	3400	-73.7426	4.49984
A.P00539	3600	-73.7426	4.49984
A.P00540	3700	-73.7426	4.49984
A.P00541	3800	-73.7426	4.49984
A.P00542	3500	-73.7426	4.49984
A.P00543	3600	-73.7426	4.49984
A.P00544	3570	-73.7693	4.68078
A.P00545	3700	-73.7693	4.68983
A.P00546	3200	-73.7604	4.66268																																											1
A.P00547	3350	-73.7694	4.67174
A.P00548	3400	-73.7694	4.67174
A.P00549	3500	-73.7693	4.68078
A.P00550	3200	-73.7604	4.66268
A.P00551	3300	-73.7694	4.67174
A.P00552	3400	-73.7694	4.67174
A.P00553	3500	-73.7693	4.68078
A.P00554	3450	-73.7693	4.68078
A.P00555	3250	-73.7604	4.66268
A.P00556	3400	-73.7694	4.67174																													1
A.P00557	3200	-73.8234	4.71706																												1
A.P00558	3600	-73.8234	4.71706
A.P00585	3515	-76.0601	5.11521
A.P00586	3820	-76.0601	5.11521
A.P00587	3820	-76.0601	5.11521
A.P00588	3820	-76.0601	5.11521
A.P00589	3820	-76.0601	5.11521
A.P00590	3800	-76.0872	5.1423
A.P00591	3975	-76.0963	5.16942
A.P00592	3800	-76.0872	5.1423
A.P00593	3570	-76.0781	5.12423
A.P00594	3330	-76.0781	5.11518
A.P00595	3535	-76.0691	5.12424
A.P00596	3525	-76.0691	5.12424
A.P00597	3390	-76.0691	5.1152
A.P00598	3490	-76.0691	5.12424
A.P00599	3490	-76.0691	5.09711
A.P00600	3390	-76.0691	5.1152
A.P00601	3500	-76.0601	5.11521
A.P00602	3500	-76.0691	5.09711
A.P00603	3500	-76.0691	5.12424
A.P00604	3500	-76.0691	5.09711
A.P00605	3500	-76.0691	5.09711
A.P00606	3500	-76.0691	5.09711
A.P00607	3500	-76.0691	5.09711
A.P00608	3330	-76.0781	5.11518
A.P00609	3720	-76.0601	5.11521
A.P00610	4100	-76.0963	5.16942																							1
A.P00611	4000	-76.0963	5.16942
A.P00612	3950	-76.0872	5.16039
A.P00613	3420	-76.0691	5.1152
A.P00614	3650	-76.0601	5.11521
A.P00615	3425	-76.0691	5.1152																																				1
A.P00616	3475	-76.0691	5.12424
A.P00617	3620	-76.0601	5.11521
A.P00618	3600	-76.0601	5.11521
A.P00619	3520	-76.0691	5.09711
A.P00620	3300	-76.0691	5.1152																																				1
A.P00621	3520	-76.0691	5.09711
A.P00622	3650	-76.0601	5.11521																																			1
A.P00623	3650	-76.0601	5.11521
A.P00624	3820	-76.0601	5.11521																							1
A.P00625	3860	-76.0601	5.11521																							1
A.P00626	3110	-72.9134	10.3377																																											1
A.P00627	3110	-72.9134	10.3377
A.P00628	3435	-72.9134	10.3377
A.P00629	3435	-72.9134	10.3377
A.P00630	3175	-72.9134	10.3377
A.P00631	3175	-72.9134	10.3377
A.P00632	3175	-72.9134	10.3377
A.P00633	3350	-72.9134	10.3377
A.P00634	3310	-72.9134	10.3377
A.P00635	3425	-72.9134	10.3377					1
A.P00636	3435	-72.9134	10.3377
A.P00637	3175	-72.9134	10.3377
A.P00640	3003	-72.9413	10.2566													1
A.P00641	3029	-72.9413	10.2566													1
A.P00643	3161	-72.9412	10.2656													1
A.P00644	2988	-72.9413	10.2566
A.P00645	2899	-72.9414	10.2475
A.P00646	2948	-72.9414	10.2475					1								1
A.P00647	2954	-72.9413	10.2566					1
A.P00648	3012	-72.9413	10.2566					1				1
A.P00649	3086	-72.9413	10.2566													1
A.P00650	2947	-72.9414	10.2475					1
A.P00653	3257	-72.9412	10.2656					1								1
A.P00654	3280	-72.9412	10.2656													1
A.P00656	3003	-72.9413	10.2566													1
A.P00657	3048	-72.9413	10.2566													1
A.P00658	3002	-72.9413	10.2566													1
A.P00659	3110	-72.9412	10.2656
A.P00660	3077	-72.9413	10.2566					1				1
A.P00661	3077	-72.9413	10.2566					1				1
A.P00662	3134	-72.9412	10.2656					1				1
A.P00663	2944	-72.9414	10.2475					1				1				1
A.P00664	3077	-72.9413	10.2566					1								1
A.P00665	3124	-72.9412	10.2656													1
A.P00666	3125	-72.9412	10.2656
A.P00667	3172	-72.9412	10.2656													1
A.P00668	3357	-72.9321	10.2746
A.P00669	3359	-72.9321	10.2746					1
A.P00670	2961	-72.9413	10.2566					1
A.P00671	3044	-72.9413	10.2566
A.P00672	3096	-72.9413	10.2566					1
A.P00777	4380	-72.3107	6.42078
A.P00778	4220	-72.9715	6.09836
A.P00779	4330	-72.3107	6.42078					1
A.P00780	4015	-74.1128	3.93955																	1
A.P00781	4200	-72.293	6.35744
A.P00784	4355	-72.3107	6.42078
A.P00785	4280	-72.32	6.36661
A.P00786	4385	-72.3107	6.42078
A.P00787	4405	-72.3017	6.42074
A.P00788	4390	-72.3017	6.42074
A.P00789	4315	-72.3107	6.42078
A.P00790	4125	-72.329	6.36666
A.P00791	4250	-72.293	6.3484
A.P00792	4430	-72.3017	6.42074																																							1
A.P00793	4315	-72.3107	6.42078																																							1
A.P00794	4335	-72.3107	6.42078
A.P00795	4425	-72.3017	6.42074																																							1
A.P00796	4410	-72.3017	6.42074																																							1
A.P00798	4190	-72.293	6.35744																																							1
A.P00800	4170	-74.1128	3.93955																																							1
A.P00808	4160	-72.293	6.35744																																							1
A.P00837	4130	-74.1128	3.93955
A.P00838	4100	-74.1128	3.93955
A.P00853	3795	-73.0712	6.01735
A.P00856	3550	-74.1668	3.96674
A.P00857	3420	-74.1578	3.95769
A.P00858	3620	-72.5476	5.9791
A.P00859	3800	-74.1488	3.94863
A.P00860	3480	-74.0309	4.57265
A.P00861	3700	-73.7874	4.68081
A.P00862	3655	-74.0029	5.21483
A.P00863	3680	-74.0029	5.21483
A.P00864	3675	-74.0029	5.21483
A.P00865	3670	-74.0029	5.21483
A.P00866	3675	-74.0029	5.21483
A.P00867	3730	-73.0806	5.90889
A.P00868	3800	-73.0893	5.98125
A.P00869	3800	-73.0893	5.98125
A.P00870	3765	-72.9083	6.09812
A.P00871	3520	-73.0806	5.90889
A.P00872	3685	-74.03	5.21487
A.P00873	3605	-73.9848	5.28716
A.P00874	4050	-74.1128	3.93955
A.P00875	3725	-73.0803	5.97218
A.P00876	3820	-73.0712	6.01735
A.P00877	3605	-72.9265	6.06203
A.P00878	3935	-73.0893	5.98125
A.P00880	3700	-72.3378	6.41189					1	1																													1
A.P00881	3780	-74.2749	3.96685																											1
A.P00882	4160	-72.293	6.35744
A.P00884	3620	-74.03	5.21487					1
A.P00885	3550	-74.03	5.21487					1
A.P00886	3620	-73.9848	5.28716																																							1
A.P00887	3640	-74.03	5.21487
A.P00900	4280	-72.32	6.36661																																								1
A.P00901	4310	-72.32	6.36661																																								1
A.P00908	4100	-74.1128	3.93955
A.P00909	3635	-74.1218	3.93956
A.P00910	3150	-738605704	109844823					1
A.P00911	3100	-738605704	109844823					1
A.P00912	3200	-74	11																																												1
A.P00913	3500	-74	11					1																																							1
A.P00914	3750	-738608114	109211865																																												1
A.P00915	3770	-738608114	109211865
A.P00916	3900	-738699949	10912178																																												1	1
A.P00917	4100	-738791441	109122115																																												1
A.P00921	3300	-739062947	109936918																																												1
A.P00922	3700	-738608114	109211865					1																																							1
A.P00923	3740	-738608114	109211865					1	1																																						1
A.P01046	4200	-779421336	0,8086387																1																								1
A.P01047	4200	-779421336	0,8086387																1																								1
A.P01048	4200	-779421336	0,8086387																1
A.P01049	4100	-779421271	0,7996035																1																								1
A.P01050	4100	-779331514	0,7996099																																								1
A.P01051	4100	-779331514	0,7996099																																								1
A.P01052	4000	-779241757	0,7996164
A.P01053	4000	-779241757	0,7996164
A.P01054	4000	-779241757	0,7996164
A.P01055	3900	-779151998	0,7996228																																								1
A.P01056	3900	-779151998	0,7996228																																								1
A.P01057	3900	-779151998	0,7996228																																								1
A.P01058	3800	-779151998	0,7996228
A.P01059	3800	-779151998	0,7996228
A.P01060	3800	-779151998	0,7996228
A.P01061	3700	-779151935	0,7905873																																							1
A.P01062	3700	-779151935	0,7905873
A.P01063	3700	-779151935	0,7905873																																							1
A.P01064	3600	-779151935	0,7905873
A.P01065	3600	-779151935	0,7905873
A.P01066	3600	-779151935	0,7905873
A.P01067	4200	-77.9332	0.808645																1
A.P01068	4200	-77.9332	0.808645																1				1
A.P01069	4200	-77.9332	0.808645
A.P01070	4300	-77.9332	0.808645																																								1
A.P01071	4300	-77.9332	0.808645																																								1
A.P01072	4300	-77.9332	0.808645																																								1
A.P01073	4400	-77.9332	0.808645																																								1
A.P01074	4400	-77.9332	0.808645
A.P01075	4400	-77.9332	0.808645																																								1
A.P01076	4500	-77.9332	0.808645
A.P01077	4500	-77.9332	0.808645
A.P01078	4500	-77.9332	0.808645
A.P01079	4200	-78.0133	-0.004535																																							1	1
A.P01080	4200	-78.0133	-0.004535																																							1	1
A.P01081	4200	-78.0133	-0.004535																																							1	1
A.P01082	4300	-78.1838	0.248481																																												1
A.P01083	4300	-78.1838	0.248481																																												1
A.P01084	4200	-78.4251	-1.64044																1																							1
A.P01085	4200	-78.4251	-1.64044
A.P01086	4200	-78.4251	-1.64044																																							1	1			1
A.P01087	4200	-78.7666	-1.47813																				1																			1					1
A.P01088	4200	-78.7666	-1.47813																																							1
A.P01089	4200	-78.7666	-1.47813																																							1					1
A.P01090	4400	-78.7756	-1.47814																																							1					1
A.P01091	4400	-78.7756	-1.47814																																							1
A.P01092	4400	-78.7756	-1.47814																																							1					1
A.P01093	4300	-78.7666	-1.47813																																							1
A.P01094	4300	-78.7666	-1.47813																																							1					1
A.P01095	4300	-78.7666	-1.47813																																							1					1
A.P01096	4500	-78.7756	-1.47814																																							1
A.P01097	4500	-78.7756	-1.47814																																							1					1
A.P01098	4500	-78.7756	-1.47814																																							1					1
A.P01099	4500	-78.1747	-0.492495																																							1					1
A.P01100	4500	-78.1747	-0.492495																																							1					1
A.P01101	4500	-78.1747	-0.492495																																							1					1
A.P01102	4300	-78.1837	-0.492499																					1																		1
A.P01103	4300	-78.1837	-0.492499																					1																		1
A.P01104	4400	-78.1747	-0.492495																																							1
A.P01105	4400	-78.1747	-0.492495
A.P01106	4400	-78.1747	-0.492495																																							1
A.P01107	4300	-78.5608	-0.158204																																							1					1
A.P01108	4300	-78.5608	-0.158204																					1
A.P01109	4300	-78.5608	-0.158204
A.P01110	4200	-78.7043	-0.655422																																							1
A.P01111	4200	-78.7043	-0.655422
A.P01112	4200	-78.7043	-0.655422
A.P01113	4200	-78.4439	-0.646256																					1																							1
A.P01114	4200	-78.4439	-0.646256																					1																		1
A.P01115	4200	-78.4439	-0.646256																					1																		1					1
A.P01116	4300	-78.1837	-0.492499																																							1
A.P01117	4200	-77.9419	-0.103923																1																								1
A.P01118	4200	-77.9419	-0.103923																1																								1
A.P01119	4200	-77.9419	-0.103923																																								1
A.P01120	4100	-77.9419	-0.103923																																								1
A.P01121	4100	-77.9419	-0.103923																																								1
A.P01122	4100	-77.9419	-0.103923																				1
A.P01123	4200	-78.1029	-0.483428																																								1
A.P01124	4200	-78.1029	-0.483428																																								1
A.P01125	4200	-78.1029	-0.483428																																								1
A.P01126	4300	-78.1029	-0.483428																																								1
A.P01127	4300	-78.1029	-0.483428																																								1
A.P01128	4300	-78.1029	-0.483428																																								1
A.P01129	4200	-77.9421	0.808639																1
A.P01130	4400	-78.4251	-1.64948																1																								1
A.P01131	4300	-78.4251	-1.64948																1					1
A.P01132	4300	-78.4251	-1.64948																					1
A.P01133	4300	-78.505	-2.25517																					1																			1
A.P01134	4300	-78.505	-2.25517																					1																			1
A.P01135	4200	-78.505	-2.25517																					1																		1	1
A.P01136	4200	-78.505	-2.25517																																								1
A.P01137	4200	-78.505	-2.25517																																								1
A.P01138	4100	-78.2909	-1.23359																1
A.P01139	4100	-78.2909	-1.23359
A.P01140	4100	-78.2909	-1.23359																1
A.P01141	4200	-78.2909	-1.23359																1
A.P01142	4200	-78.2909	-1.23359																1																								1
A.P01143	4200	-78.2909	-1.23359																1
A.P01144	4200	-77.9421	0.808639																1				1
A.P01145	4200	-77.9421	0.808639
A.P01146	4300	-78.1838	0.248481																1																								1
A.P01147	4400	-78.1838	0.257518																																								1
A.P01148	4400	-78.1838	0.257518																																								1
A.P01149	4200	-78.3453	0.347928																																												1
A.P01150	4200	-78.3453	0.347928																1
A.P01151	4200	-78.3453	0.347928																1																								1				1
A.P01152	4300	-78.3453	0.347928																1																								1
A.P01153	4300	-78.3453	0.347928																1																								1
A.P01154	4300	-78.3453	0.347928																																								1
A.P01155	4400	-79.2503	-2.78075																1
A.P01156	4400	-79.2503	-2.78075																1																												1
A.P01157	4400	-79.2503	-2.78075																1																												1
A.P01158	4300	-79.2503	-2.78075																1					1																		1					1
A.P01159	4300	-79.2503	-2.78075																					1																							1
A.P01160	4300	-79.2503	-2.78075
A.P01161	4300	-78.7043	-0.655422																								1															1	1
A.P01162	4300	-78.7043	-0.655422																																							1					1
A.P01163	4300	-78.7043	-0.655422																																							1	1
A.P01164	4400	-78.5608	-0.158204																																							1
A.P01165	4400	-78.5608	-0.158204																																								1
A.P01166	4400	-78.5608	-0.158204
A.P01167	4400	-78.0133	-0.004535																																								1
A.P01168	4400	-78.0133	-0.004535																																								1
A.P01169	4400	-78.0133	-0.004535																																								1
A.P01170	4300	-78.0133	-0.004535																				1																			1	1
A.P01171	4300	-78.505	-2.25517																																								1
A.P01172	4100	-78.4519	-1.76701																					1																			1
A.P01173	4100	-78.4519	-1.76701																					1																			1
A.P01174	4100	-78.4519	-1.76701																					1																			1
A.P01175	4200	-78.4519	-1.76701																																								1
A.P01176	4200	-78.4519	-1.76701																					1																			1
A.P01177	4200	-78.4519	-1.76701																					1																			1
A.P01178	4300	-78.4519	-1.76701																					1																			1
A.P01179	4300	-78.4519	-1.76701																					1																			1
A.P01180	4300	-78.4519	-1.76701																					1																			1
A.P01181	4200	-78.4519	-1.76701																																								1
A.P01182	4100	-78.4519	-1.76701																																								1
A.P01183	4400	-78.4251	-1.64948																																								1
A.P01184	4300	-78.4251	-1.64948																					1
A.P01185	4300	-77.9418	-0.094888																																								1
A.P01186	4300	-77.9418	-0.094888																																								1
A.P01187	4300	-77.9418	-0.094888
A.P01188	4200	-78.4519	-1.76701																																								1
A.P01189	4200	-78.4519	-1.76701																																								1
A.P01190	4100	-78.4519	-1.76701																					1																			1
A.P01191	4100	-78.4519	-1.76701																					1																			1
A.P01192	4400	-77.9418	-0.094888																																								1
A.P01193	4400	-77.9418	-0.094888																																								1
A.P01194	4400	-77.9418	-0.094888																																								1
A.P01195	4400	-77.9418	-0.094888																1																								1
A.P01196	4400	-77.9418	-0.094888																																								1
A.P01197	4400	-78.4609	-1.75798																																								1
A.P01198	4300	-78.2909	-1.23359																																								1
A.P01199	4300	-78.2909	-1.23359																																								1
A.P01200	4300	-78.2909	-1.23359																																								1
A.P01201	4300	-77.9421	0.808639																																								1
A.P01202	4300	-77.9421	0.808639																																								1
A.P01203	4300	-77.9421	0.808639																																								1
A.P01204	4400	-77.9421	0.808639																																								1
A.P01205	4100	-78.4433	-1.4597																																								1
A.P01206	4100	-78.4433	-1.4597																																								1
A.P01207	4000	-78.4433	-1.4597																																								1
A.P01208	4000	-78.4433	-1.4597																																								1
A.P01209	4200	-78.8834	-1.49632																																												1		1
A.P01210	4200	-78.8834	-1.49632																																												1
A.P01211	4200	-78.8834	-1.49632																																												1
A.P01212	4400	-78.8654	-1.49631																																												1
A.P01213	4400	-78.8654	-1.49631																																												1
A.P01214	4500	-78.8654	-1.48727																					1																							1
A.P01215	4500	-78.8654	-1.48727																					1																							1
A.P01216	4400	-78.8654	-1.49631																																												1
A.P01217	4300	-78.8744	-1.49632																																												1
A.P01218	4300	-78.8744	-1.49632																																												1
A.P01219	4300	-78.8744	-1.49632																																												1
A.P01220	4500	-78.8654	-1.48727																					1																							1
A.P01221	4600	-78.8654	-1.48727																					1																							1
A.P01222	4600	-78.8654	-1.48727																					1																							1
A.P01223	4600	-78.8654	-1.48727																																												1
A.P01224	4700	-78.8564	-1.47822																																												1
A.P01225	4700	-78.8564	-1.47822																																												1
A.P01226	4700	-78.8564	-1.47822																																												1
A.P01227	4800	-78.8475	-1.47821																																								1				1
A.P01228	4800	-78.8475	-1.47821																																												1
A.P01229	4800	-78.8475	-1.47821																																												1
A.P01230	4100	-78.4433	-1.4597																																								1
A.P01231	4300	-78.4433	-1.4597																																								1
A.P01232	4300	-78.4433	-1.4597																																								1
A.P01233	4300	-78.4433	-1.4597																																								1
A.P01234	4000	-78.4433	-1.4597																																								1
A.P01235	4200	-78.4433	-1.4597																																								1
A.P01236	4200	-78.4433	-1.4597																																								1
A.P01237	4200	-78.4433	-1.4597																																								1
A.P01238	4400	-77.9421	0.808639
A.P01239	4400	-77.9421	0.808639																																								1
A.P01240	4500	-77.9421	0.817674
A.P01241	4500	-77.9421	0.817674
A.P01242	4500	-77.9421	0.817674
A.P01243	4700	-78.0043	0.094849
A.P01244	4700	-78.0043	0.094849
A.P01245	4700	-78.0043	0.094849
A.P01246	4500	-78.4251	-1.64948																																								1
A.P01247	4500	-78.4251	-1.64948																																								1
A.P01248	4500	-78.4251	-1.64948																																								1
A.P01249	4400	-78.4251	-1.64948																																								1
A.P01250	4600	-78.7756	-1.47814																																												1
A.P01251	4600	-78.7756	-1.47814																																												1
A.P01252	4600	-78.7756	-1.47814																																												1
A.P01253	4400	-78.4609	-1.75798																					1																			1
A.P01254	4400	-78.4609	-1.75798																					1																			1
A.P01255	4400	-78.1119	-0.483432																																								1
A.P01256	4400	-78.1119	-0.483432																																								1
A.P01257	4400	-78.1119	-0.483432																																								1
A.P01258	4500	-78.1119	-0.483432																																								1
A.P01259	4500	-78.1119	-0.483432																																								1
A.P01260	4500	-78.1119	-0.483432																																								1
A.P01261	4600	-78.1119	-0.483432
A.P01262	4600	-78.1119	-0.483432																																								1
A.P01263	4600	-78.1119	-0.483432
A.P01264	4500	-78.5698	-0.158205																																							1
A.P01265	4500	-78.5698	-0.158205
A.P01266	4500	-78.5698	-0.158205
A.P01267	4600	-78.5698	-0.158205
A.P01268	4500	-78.0133	0.0948498																																								1
A.P01269	4500	-78.0133	0.0948498																																								1
A.P01270	4500	-78.0133	0.0948498																																								1
A.P01271	4600	-78.0133	0.0948498																																								1
A.P01272	4600	-78.0133	0.0948498																																								1
A.P01273	4500	-78.3453	0.356965																																								1
A.P01274	4500	-78.3453	0.356965																																								1
A.P01275	4400	-78.3453	0.356965																																								1
A.P01276	4400	-78.3453	0.356965																																								1
A.P01277	4400	-78.3453	0.356965																																								1
A.P01278	4400	-78.7043	-0.655422																																								1
A.P01279	4400	-78.7043	-0.655422
A.P01280	4400	-78.7043	-0.655422
A.P01281	4500	-78.7043	-0.655422
A.P01283	4500	-78.7043	-0.655422
A.P01284	4600	-78.7133	-0.655426																																								1
A.P01285	4600	-78.7133	-0.655426																																								1
A.P01286	4700	-78.7133	-0.655426
A.P01287	4700	-78.7133	-0.655426
A.P01288	4700	-78.7133	-0.655426																																								1
A.P01289	4400	-78.1838	0.257518
A.P01290	4600	-78.3453	0.356965
A.P01291	4600	-78.3453	0.356965																																								1
A.P01292	4600	-78.3453	0.356965
A.P01293	4500	-78.3453	0.356965
A.P01294	4600	-78.5698	-0.158205																																								1
A.P01295	4600	-78.5698	-0.158205																																								1
A.P01296	4600	-78.7133	-0.655426
A.P01297	4600	-78.7133	-0.655426																																								1
A.P01298	4600	-78.7133	-0.655426																																												1
A.P01299	4600	-78.1657	-0.492491																																												1
A.P01300	4600	-78.1657	-0.492491																																												1
A.P01301	4700	-78.1657	-0.492491																																								1				1
A.P01302	4700	-78.1657	-0.492491																																								1				1
A.P01303	4700	-78.1657	-0.492491																																												1
A.P01304	4700	-78.4439	-0.664333																																												1
A.P01305	4700	-78.4439	-0.664333																																												1
A.P01306	4700	-78.4439	-0.664333
A.P01307	4600	-78.4439	-0.655295
A.P01308	4600	-78.4439	-0.655295
A.P01309	4600	-78.4439	-0.655295
A.P01310	4400	-78.4439	-0.655295																																												1
A.P01311	4400	-78.4439	-0.655295																																												1
A.P01312	4400	-78.4439	-0.655295																																												1
A.P01313	4500	-78.4439	-0.655295																																												1
A.P01314	4500	-78.4439	-0.655295																																												1
A.P01315	4500	-78.4439	-0.655295																																												1
A.P01316	4300	-78.4439	-0.646256
A.P01317	4300	-78.4439	-0.646256																																												1
A.P01318	4300	-78.4439	-0.646256																																												1
A.P01319	4200	-78.4439	-0.646256
A.P01320	4200	-78.4439	-0.646256																																							1
A.P01321	4200	-78.4439	-0.646256																																							1
A.P01408	4000	-78.444	-0.637218																																							1
A.P01409	4000	-78.444	-0.637218																																							1
A.P01410	4000	-78.444	-0.637218																																							1
A.P01411	4000	-78.444	-0.637218																																							1
A.P01412	3800	-76.1472	2.89903
A.P01413	3800	-76.1472	2.89903
A.P01414	3700	-76.1472	2.89903
A.P01415	3400	-76.3535	2.36517
A.P01416	3380	-76.3535	2.36517
A.P01417	3300	-76.3535	2.36517
A.P01418	3300	-76.3535	2.36517
A.P01419	3300	-76.3535	2.36517
A.P01420	3650	-76.1472	2.89903
A.P01485	3650	-73.7426	4.49984
A.P01486	3650	-73.7426	4.49984
A.P01487	3650	-73.7426	4.49984
A.P01488	3650	-73.7426	4.49984
A.P01489	3650	-73.7426	4.49984
A.P01490	3650	-73.7426	4.49984
A.P01491	3650	-73.7426	4.49984
A.P01492	3650	-73.7426	4.49984
A.P01493	3650	-73.7426	4.49984
A.P01494	3650	-73.7426	4.49984
A.P01495	3650	-73.7426	4.49984
A.P01496	3650	-73.7693	4.68983
A.P01497	3650	-73.7693	4.68983
A.P01498	3650	-73.7693	4.68983
A.P01499	3650	-73.7693	4.68983
A.P01500	3650	-73.7693	4.68983
A.P01501	3650	-73.7426	4.49984
A.P01502	3650	-73.7426	4.49984
A.P01503	3650	-73.7426	4.49984
A.P01504	3650	-73.7426	4.49984
A.P01505	3650	-73.7426	4.49984
A.P01506	3650	-73.7426	4.49984
A.P01507	3650	-73.7426	4.49984
A.P01508	3650	-73.7426	4.49984
A.P01509	3650	-73.7426	4.49984
A.P01510	3650	-73.7426	4.49984
A.P01511	3650	-73.7426	4.49984
A.P01512	3650	-73.7426	4.49984
A.P01513	3650	-73.7426	4.49984
A.P01514	3712.5	-73.7693	4.68983
A.P01515	3712.5	-73.7693	4.68983
A.P01516	3712.5	-73.7693	4.68983
A.P01517	3712.5	-73.7693	4.68983
A.P01518	3712.5	-73.7693	4.68983
A.P01519	3712.5	-73.7693	4.68983
A.P01520	3712.5	-73.7693	4.68983
A.P01521	3712.5	-73.7693	4.68983
A.P01522	3712.5	-73.7693	4.68983
A.P01523	3712.5	-73.7693	4.68983
A.P01524	3712.5	-73.7693	4.68983
A.P01541	3300	-73.8056	4.57231																																							1
A.P01542	3200	-73.7966	4.56325																																							1
A.P01543	3230	-73.7966	4.56325
A.P01544	3500	-73.8056	4.58135
A.P01545	3250	-73.7966	4.56325					1
A.P01546	3170	-73.7696	4.54511					1																																		1
A.P01547	3150	-73.7696	4.54511					1																																								1
A.P01548	3350	-73.8056	4.57231																																							1
A.P01549	3150	-73.7696	4.54511
A.P01550	3150	-73.7696	4.54511
A.P01551	3150	-73.7696	4.54511
A.P01552	3150	-73.7696	4.54511					1																																		1
A.P01555	3155	-73.7696	4.54511
A.P01556	3155	-73.7696	4.54511					1																																		1
A.P01557	NA	-73.7696	4.54511
A.P01558	3160	-73.7696	4.54511
A.P01559	3150	-73.7696	4.54511
A.P01560	3350	-73.8056	4.57231					1
A.P01561	3300	-73.8056	4.57231
A.P01562	NA	-73.7696	4.54511
A.P01570	3280	-72.838	5.5916					1						1																								1
A.P01571	3080	-72.838	5.5916											1																								1
A.P01572	3400	-72.847	5.59163
A.P01573	3250	-72.847	5.59163																																			1
A.P01574	3300	-72.847	5.59163
A.P01663	4200	-75.3382	4.92603
A.P01664	4300	-75.3202	4.92604
A.P01665	4270	-75.3382	4.92603																																							1	1
A.P01670	4300	-75.3563	4.88079
A.P01671	4270	-75.3022	4.917
A.P01672	4300	-75.3382	4.92603																																						1
A.P01673	4240	-75.3382	4.92603																																						1
A.P01674	4310	-75.3382	4.91698																																						1
A.P01675	4300	-75.3382	4.92603																																						1
A.P01676	4175	-75.3383	4.93508																																								1
A.P01677	4300	-75.3382	4.92603
A.P01678	4400	-75.3382	4.91698																																						1
A.P01679	4400	-75.3382	4.91698																																						1
A.P01680	4350	-75.3382	4.91698																																								1
A.P01682	4250	-75.3382	4.92603
A.P01683	4200	-75.3382	4.92603		1															1																							1
A.P01685	4070	-75.3383	4.93508
A.P01686	4170	-75.3383	4.93508
A.P01687	4300	-75.3202	4.92604
A.P01689	4200	-75.3382	4.92603
A.P01690	4360	-75.3382	4.91698																																								1
A.P01691	4360	-75.3382	4.91698																																								1
A.P01692	4300	-75.3382	4.92603																																								1
A.P01693	4300	-75.3382	4.92603
A.P01694	4300	-75.3563	4.88079
A.P01695	4175	-75.3383	4.93508																																						1
A.P01696	4370	-75.3382	4.91698																																								1
A.P01697	4400	-75.3563	4.88079																																								1
A.P01698	4250	-75.3563	4.88079																																								1
A.P01699	4250	-75.3563	4.88079																																								1
A.P01700	4300	-75.3563	4.88079
A.P01701	4300	-75.3563	4.88079																																								1
A.P01702	4300	-75.3563	4.88079																																								1
A.P01703	4420	-75.3382	4.91698																																								1
A.P01704	4420	-75.3382	4.91698																																								1
A.P01705	4300	-75.3382	4.92603																																								1
A.P01706	4325	-75.3382	4.92603																																								1
A.P01707	4370	-75.3382	4.91698
A.P01708	4360	-75.3382	4.91698																																								1
A.P01709	4200	-75.3382	4.92603																																								1
A.P01710	4360	-75.3382	4.92603																																								1
A.P01711	4470	-75.3382	4.91698																																								1
A.P01712	4280	-75.3563	4.88079																																								1
A.P01713	4260	-75.3563	4.88079																																								1
A.P01714	4270	-75.3563	4.88079																																								1
A.P01716	4060	-75.3383	4.93508																																								1
A.P01719	4150	-75.3022	4.917
A.P01720	4300	-75.3202	4.92604
A.P01721	4300	-75.3202	4.92604
A.P01722	4200	-75.3563	4.88079																																								1
A.P01726	4300	-75.3563	4.86269																																								1
A.P01732	3980	-75.3383	4.93508
A.P01733	4000	-75.3383	4.93508
A.P01734	3985	-75.3383	4.93508
A.P01735	4170	-75.3382	4.92603
A.P01736	4200	-75.3382	4.92603
A.P01737	4100	-75.3383	4.93508
A.P01738	4160	-75.3383	4.93508																																							1
A.P01739	4180	-75.3383	4.93508																																								1
A.P01740	4080	-75.3383	4.93508
A.P01741	4220	-75.3563	4.86269
A.P01742	4100	-75.3383	4.93508
A.P01743	4080	-75.3383	4.93508
A.P01744	4050	-75.3383	4.93508
A.P01745	3980	-75.3202	4.93508
A.P01746	3810	-75.3202	4.94413
A.P01747	3920	-75.3202	4.93508
A.P01748	3920	-75.3202	4.93508
A.P01749	3955	-75.2932	4.92605
A.P01750	3955	-75.2932	4.92605
A.P01751	3955	-75.2932	4.92605
A.P01752	3900	-75.2932	4.92605
A.P01753	3900	-75.2932	4.92605
A.P01755	4050	-75.3383	4.93508																																							1
A.P01756	3955	-75.2932	4.92605																																								1
A.P01757	3955	-75.2932	4.92605
A.P01758	3955	-75.2932	4.92605
A.P01759	3955	-75.2932	4.92605
A.P01760	4165	-75.3383	4.93508
A.P01761	4080	-75.3383	4.93508
A.P01762	4150	-75.3022	4.917
A.P01764	3925	-75.2932	4.92605
A.P01766	4060	-75.3383	4.93508																																								1
A.P01767	3955	-75.2932	4.92605
A.P01768	3955	-75.2932	4.92605
A.P01769	4000	-75.3383	4.93508																	1
A.P01771	4020	-75.3383	4.93508
A.P01772	3620	-75.3202	4.96222
A.P01776	3980	-75.3202	4.93508
A.P01777	4000	-75.3383	4.93508
A.P01778	4000	-75.3383	4.93508
A.P01779	4000	-75.3202	4.93508
A.P01780	3860	-75.3202	4.94413
A.P01782	3600	-76.4074	2.34703																						1
A.P01783	3600	-76.4074	2.34703																						1
A.P01784	3600	-76.4074	2.34703
A.P01785	3600	-76.4074	2.34703																						1
A.P01786	3500	-76.3985	2.35608
A.P01789	4080	-76.3984	2.32895
A.P01790	4350	-76.3984	2.3199
A.P01791	4010	-76.3984	2.33799																																						1
A.P01792	4360	-76.3984	2.3199																																						1
A.P01793	4200	-76.3984	2.32895
A.P01794	4300	-76.3984	2.3199
A.P01795	4350	-76.3984	2.3199
A.P01796	4380	-76.3984	2.3199
A.P01797	4360	-76.3984	2.3199
A.P01798	4350	-76.3984	2.3199
A.P01806	3360	-76.3535	2.36517
A.P01807	3380	-76.3535	2.36517
A.P01808	3320	-76.3535	2.36517
A.P01809	3250	-76.3535	2.36517
A.P01810	3280	-76.3535	2.36517
A.P01811	3250	-76.3535	2.36517
A.P01812	3310	-76.3535	2.36517
A.P01813	3600	-76.3985	2.35608
A.P01814	3300	-76.3535	2.36517
A.P01815	3300	-76.3535	2.36517
A.P01816	3350	-76.3535	2.36517
A.P01817	3580	-76.3985	2.35608
A.P01818	3720	-76.3985	2.34703
A.P01819	3700	-76.3985	2.34703
A.P01820	3700	-76.3985	2.34703
A.P01821	3700	-76.3985	2.34703
A.P01822	3250	-76.3625	2.36516
A.P01823	3300	-76.3625	2.36516
A.P01824	3250	-76.3535	2.36517																	1
A.P01825	3300	-76.3625	2.36516
A.P01826	3380	-76.3535	2.36517
A.P01827	3300	-76.3535	2.36517
A.P01828	3330	-76.3625	2.36516
A.P01829	3200	-76.3535	2.36517
A.P01830	3330	-76.3625	2.36516																						1
A.P01831	3300	-76.3625	2.36516
A.P01832	3300	-76.3625	2.36516
A.P01833	3300	-76.3625	2.36516
A.P01834	3600	-76.3985	2.35608
A.P01835	3500	-76.3985	2.35608
A.P01836	3580	-76.3985	2.35608
A.P01837	3620	-76.3985	2.35608
A.P01838	3350	-76.3985	2.36512
A.P01839	3700	-76.3985	2.34703
A.P01840	3750	-76.3985	2.34703
A.P01841	3600	-76.3985	2.35608
A.P01842	3800	-76.3985	2.34703
A.P01843	3780	-76.3985	2.34703
A.P01844	3820	-76.3985	2.34703
A.P01845	3500	-76.3985	2.35608
A.P01851	3330	-76.3625	2.36516
A.P01853	3150	-73.8606	10.9845					1
A.P01854	3100	-73.8606	10.9845					1
A.P01855	3200	-73.9063	10.9937																																												1
A.P01856	3500	-73.8608	10.9302					1																																							1
A.P01857	3750	-73.8608	10.9212																																												1
A.P01858	3770	-73.8608	10.9212
A.P01859	3900	-73.87	10.9122																																												1	1
A.P01860	4100	-73.8791	10.9122																																												1
A.P01864	3300	-73.9063	10.9937																																												1
A.P01865	3700	-73.8608	10.9212					1																																							1
A.P01866	3740	-73.8608	10.9212					1	1																																						1
A.P01868	3600	-74.2838	4.04827						1
A.P01869	3650	-74.2838	4.04827						1
A.P01870	3810	-74.2115	4.2834
A.P01871	3925	-74.2568	4.04824
A.P01872	3680	-74.1218	3.93956
A.P01873	3700	-74.2748	4.04826					1
A.P01876	3950	-74.2568	4.04824																																													1
A.P01877	3800	-74.2115	4.2834
A.P01878	3450	-74.1578	3.95769
A.P01879	3450	-74.1578	3.95769											1																									1									1
A.P01880	3450	-74.1668	3.9577					1																																							1	1
A.P01883	3725	-74.1218	3.93956
A.P01884	3900	-74.2298	3.9849
A.P01885	3925	-74.2568	4.04824					1																																								1
A.P01886	3300	-74.1668	3.9577
A.P01887	3520	-74.1308	3.93957
A.P01888	3800	-74.1218	3.93956
A.P01889	4025	-74.1398	3.95767
A.P01890	3460	-74.3199	3.97593
A.P01891	3545	-74.3199	3.97593
A.P01892	3555	-74.2477	4.11156																																													1
A.P01895	3445	-74.3199	3.97593
A.P01896	3555	-74.2115	4.2834																																													1
A.P01897	3660	-74.2115	4.2834
A.P01898	3630	-74.1308	3.93957					1						1
A.P01899	3150	-74.1488	3.94863
A.P01900	3560	-74.2115	4.2834
A.P01901	3440	-74.2115	4.2834
A.P01902	3450	-74.3199	3.95784
A.P01903	3840	-74.2658	4.04825
A.P01904	4000	-74.2568	4.04824
A.P01905	4020	-74.1128	3.93955
A.P01906	3709	-74.1218	3.93956
A.P01907	3900	-74.1128	3.93955
A.P01908	3900	-74.1128	3.93955
A.P01909	3950	-74.1128	3.93955
A.P01910	3900	-74.1488	3.95768
A.P01911	3170	-74.2115	4.2834																																			1
A.P01912	3700	-74.1218	3.93956
A.P01913	3300	-74.1488	3.94863																																			1
A.P01914	3550	-74.2838	4.04827
A.P01915	4010	-74.1128	3.93955
A.P01916	3575	-74.2118	3.93965
A.P01917	3915	-74.1128	3.93955
A.P01918	3750	-74.1304	4.28331
A.P01919	3540	-74.1308	3.93957
A.P01920	4015	-74.1128	3.93955																1
A.P01921	4100	-74.1128	3.93955																1
A.P01922	4115	-74.1128	3.93955
A.P01923	4070	-74.1128	3.93955
A.P01924	4050	-74.1128	3.93955
A.P01925	4100	-74.1128	3.93955																																							1
A.P01926	4100	-74.1128	3.93955
A.P01927	4250	-74.1128	3.93955																1
A.P01928	4250	-74.1128	3.93955																1
A.P01929	4250	-74.1128	3.93955
A.P01930	4090	-74.1128	3.93955																																							1
A.P01931	4120	-74.1128	3.93955
A.P01932	4170	-74.1128	3.93955
A.P01933	4085	-74.1128	3.93955
A.P01934	4170	-74.1128	3.93955
A.P01935	4170	-74.1128	3.93955																																							1
A.P01938	3400	-73.9949	4.53642
A.P01939	3400	-74.0671	4.50938
A.P01940	3400	-74.0671	4.50938																												1
A.P01941	3350	-73.9859	4.54545
A.P01942	3380	-73.9859	4.54545
A.P01943	3500	-74.031	4.53647																																					1
A.P01944	3350	-73.9859	4.54545																																					1
A.P01945	3350	-74.0219	4.56359
A.P01946	3370	-73.9859	4.54545																																					1
A.P01947	3400	-73.9859	4.54545
A.P01948	3355	-73.9859	4.54545
A.P01949	3300	-73.9859	4.54545
A.P01950	3430	-74.031	4.53647																																					1
A.P01951	3370	-73.9859	4.54545
A.P01952	3380	-73.9859	4.54545
A.P01953	3400	-73.9859	4.54545
A.P01954	3410	-73.9949	4.53642																												1
A.P01955	3350	-74.0039	4.58166																												1									1							1
A.P01956	3250	-74.0219	4.56359					1																																								1
A.P01957	3435	-74.031	4.53647																																					1
A.P01958	3430	-74.0671	4.50938
A.P01959	3435	-74.031	4.53647
A.P01960	3385	-74.0671	4.50938																																					1
A.P01961	3250	-74.0219	4.56359					1																																1
A.P01962	3380	-74.0671	4.50938
A.P01963	3300	-74.0219	4.56359																																					1
A.P01964	3250	-74.0219	4.56359					1
A.P01965	3250	-74.0219	4.56359					1																																1
A.P01966	3400	-74.0671	4.50938
A.P01967	3380	-74.0671	4.50938																																					1
A.P01968	3400	-74.0671	4.50938
A.P01969	3400	-74.0129	4.56358
A.P01970	3505	-74.031	4.53647																																					1
A.P01971	3500	-74.031	4.53647
A.P01972	3440	-74.0219	4.56359																																					1
A.P01973	3500	-74.031	4.53647											1
A.P01974	3300	-73.9949	4.53642
A.P01975	3350	-73.9859	4.54545																																					1
A.P01976	3350	-73.9859	4.54545																																					1
A.P01977	3200	-74.0671	4.50938																																					1
A.P01978	3350	-74.0671	4.50938
A.P01979	3250	-74.0219	4.56359
A.P01980	3400	-73.9949	4.53642																												1																1
A.P01981	3400	-73.9949	4.53642
A.P01982	3300	-74.0671	4.50938
A.P01983	3400	-73.9859	4.54545																																					1
A.P01984	3400	-74.0129	4.56358																																					1
A.P01985	3160	-74.0671	4.50938																																					1
A.P01986	3400	-74.0671	4.50938																												1																1
A.P01987	3180	-74.0671	4.50938																																					1
A.P01988	3350	-74.0671	4.50938																																					1
A.P01989	3200	-74.0671	4.50938
A.P01990	3410	-74.0671	4.50938
A.P01991	3350	-74.0671	4.50938
A.P01992	3350	-73.9859	4.54545
A.P01993	3300	-74.0671	4.50938
A.P01994	3350	-73.9949	4.53642																												1
A.P01998	3390	-73.9949	4.53642
A.P01999	3350	-74.0671	4.50938																												1
A.P02000	3350	-74.0671	4.50938																												1
A.P02001	3400	-73.9949	4.53642																												1									1							1
A.P02002	3300	-74.0039	4.58166											1																	1
A.P02003	3300	-74.0671	4.50938																												1									1
A.P02045	3250	-74.0219	4.56359					1																																								1
A.P02046	3250	-74.0219	4.56359																																													1
A.P02048	3260	-74.0219	4.56359					1																							1																	1
A.P02054	3250	-74.0219	4.56359																																												1
A.P02058	3300	-74.0671	4.50938					1
A.P02059	3300	-74.0671	4.50938					1																							1
A.P02060	3260	-74.0671	4.50938					1
A.P02061	3250	-74.0671	4.50938					1																																		1
A.P02062	3250	-74.0671	4.50938					1																																							1
A.P02063	3300	-74.0671	4.50938					1																																								1
A.P02064	3260	-74.0671	4.50938					1																							1																	1
A.P02065	3250	-74.0219	4.56359					1																							1																	1
A.P02077	3960	-75.3563	4.95316
A.P02078	3890	-75.3563	4.95316
A.P02080	3960	-75.3563	4.95316		1
A.P02081	3930	-75.3563	4.95316
A.P02082	4200	-75.3473	4.93507
A.P02084	3930	-75.4193	4.79029																	1																					1
A.P02085	4070	-75.4193	4.79029																	1																							1
A.P02086	3920	-75.4193	4.79029
A.P02088	3850	-75.3923	4.85363
A.P02091	3800	-75.3563	4.95316
A.P02092	4340	-75.3743	4.83554																																								1
A.P02093	4340	-75.3743	4.83554
A.P02094	4360	-75.3743	4.8265
A.P02095	4350	-75.3743	4.8265
A.P02097	3970	-75.3563	4.95316
A.P02098	4130	-75.3473	4.93507
A.P02100	4380	-75.3473	4.92602																																								1
A.P02101	4310	-75.3473	4.92602		1																																										1
A.P02103	4160	-75.3833	4.84459																																							1
A.P02105	4400	-75.4554	4.79931																	1																							1				1
A.P02106	4125	-75.3833	4.84459																																							1
A.P02107	4125	-75.3833	4.84459																																							1
A.P02108	4250	-75.3743	4.83554		1
A.P02109	4150	-75.3833	4.84459		1															1																						1
A.P02110	4350	-75.3743	4.8265																																						1	1
A.P02111	4310	-75.3743	4.8265		1
A.P02112	4300	-75.4554	4.79026
A.P02113	4400	-75.4554	4.79931																	1																											1
A.P02114	4400	-75.4554	4.79931																																							1					1
A.P02115	4200	-75.4554	4.8174																	1
A.P02116	4200	-75.4554	4.8174
A.P02117	4130	-75.3473	4.93507
A.P02118	4200	-75.3833	4.83554
A.P02119	4120	-75.3473	4.93507
A.P02120	4020	-75.3473	4.94412																																												1
A.P02122	4140	-75.3473	4.93507																																												1
A.P02123	4050	-75.4554	4.8174		1
A.P02124	3900	-75.3833	4.84459
A.P02126	4130	-75.3833	4.84459
A.P02127	3960	-75.4554	4.8174
A.P02128	3850	-75.4554	4.8174
A.P02129	4140	-75.3833	4.84459																																												1
A.P02130	4030	-75.3473	4.94412																																												1
A.P02131	4015	-75.3833	4.84459		1
A.P02132	4120	-75.3922	4.69984
A.P02133	4030	-75.3473	4.94412																																												1
A.P02134	4040	-75.3473	4.94412																																												1
A.P02135	4100	-75.4193	4.78124																																												1
A.P02136	4250	-75.4554	4.78122																																												1
A.P02137	4250	-75.4554	4.78122
A.P02138	4120	-75.4374	4.78123																																												1
A.P02139	4175	-75.4554	4.8174		1
A.P02140	3920	-75.4193	4.78124																																												1
A.P02141	4090	-75.4193	4.78124																																												1
A.P02172	4430	-75.3473	4.91698
A.P02173	4420	-75.3473	4.91698
A.P02174	4650	-75.3382	4.90794
A.P02175	4450	-75.3473	4.91698																																								1
A.P02176	4450	-75.3473	4.91698																																								1
A.P02177	4320	-75.3473	4.92602
A.P02178	4380	-75.3473	4.92602																																								1
A.P02179	4370	-75.4644	4.78121																																								1
A.P02180	4375	-75.4644	4.78121
A.P02181	4220	-75.3473	4.93507																																								1
A.P02182	4380	-75.3473	4.92602																																								1
A.P02183	4230	-75.3473	4.93507
A.P02184	4230	-75.3473	4.93507		1																																						1
A.P02185	4210	-75.3473	4.93507		1
A.P02187	4250	-75.3473	4.93507
A.P02188	4320	-75.3473	4.93507
A.P02189	4460	-75.3922	4.69984
A.P02190	4320	-75.3473	4.92602
A.P02191	4230	-75.3473	4.93507
A.P02192	4200	-75.3473	4.93507																																								1
A.P02193	4450	-75.3473	4.91698																																								1
A.P02194	4400	-75.3923	4.8084																																								1
A.P02195	4400	-75.3923	4.8084																																								1
A.P02196	4500	-75.4554	4.79931																																								1
A.P02197	4470	-75.3473	4.91698
A.P02198	4380	-75.3923	4.8084																																								1
A.P02199	4390	-75.4554	4.79931																																								1
A.P02200	4500	-75.3473	4.91698																																								1
A.P02201	4420	-75.3473	4.91698																																								1
A.P02202	4430	-75.3473	4.91698																																								1
A.P02204	4450	-75.3473	4.91698																																								1
A.P02205	4420	-75.3473	4.91698																																								1
A.P02206	4540	-75.3833	4.8084																																								1
A.P02207	4550	-75.4554	4.79931																																								1
A.P02208	4450	-75.3473	4.91698
A.P02209	4320	-75.3473	4.92602
A.P02210	4390	-75.4554	4.79931
A.P02211	4380	-75.3923	4.8084																																						1
A.P02212	4350	-75.3923	4.8084																																						1		1
A.P02213	4460	-75.4554	4.79931																																						1
A.P02215	4340	-75.3923	4.8084																																						1
A.P02216	4420	-75.4554	4.79931																																						1
A.P02217	4470	-75.3923	4.8084																																						1		1
A.P02218	4350	-75.3923	4.8084																																						1
A.P02219	4400	-75.3923	4.8084																																						1		1
A.P02220	4470	-75.3923	4.8084																																						1
A.P02221	4400	-75.3923	4.8084																																						1
A.P02222	4360	-75.3923	4.8084																																						1
A.P02223	4400	-75.3923	4.8084																																						1
A.P02224	4470	-75.3201	4.6456																																						1
A.P02225	4440	-75.3201	4.6456																																						1
A.P02226	4380	-75.3473	4.92602																																						1
A.P02227	4360	-75.3473	4.92602																																						1
A.P02228	4380	-75.3473	4.92602																																						1
A.P02229	4220	-75.3473	4.93507																																						1
A.P02230	4400	-75.3201	4.6456																																						1
A.P02231	4380	-75.3473	4.92602																																						1
A.P02232	4380	-75.3473	4.92602																																						1
A.P02233	4370	-75.3473	4.92602																																						1
A.P02234	4390	-75.4554	4.79931																																						1
A.P02235	4430	-75.3201	4.6456																																								1
A.P02236	4280	-75.3473	4.92602
A.P02237	4275	-75.4554	4.78122
A.P02238	4400	-75.4554	4.79931
A.P02239	4280	-75.3473	4.92602																																						1
A.P02240	4450	-75.4644	4.78121
A.P02241	4300	-78.4433	-1.4597																																								1
A.P02242	4300	-78.4433	-1.4597																																								1
A.P02243	4300	-78.4433	-1.4597																																								1				1
A.P02244	4200	-78.4433	-1.4597																																								1
A.P02245	4200	-78.4433	-1.4597																																								1
A.P02246	4200	-78.4433	-1.4597																																								1
A.P02247	4100	-78.4433	-1.4597	1																																							1				1
A.P02248	4100	-78.4433	-1.4597																																								1				1
A.P02249	4100	-78.4433	-1.4597	1																																							1				1
A.P02250	4000	-78.4433	-1.4597	1																																							1				1
A.P02251	4000	-78.4433	-1.4597	1																																							1				1
A.P02252	4000	-78.4433	-1.4597	1																																							1				1
A.P02253	3900	-78.4433	-1.45066																																												1
A.P02254	3900	-78.4433	-1.45066																																												1
A.P02255	3900	-78.4433	-1.45066	1																																											1
A.P02256	4200	-78.434	-1.6766																																								1				1
A.P02257	4200	-78.434	-1.6766																																								1				1
A.P02258	4200	-78.434	-1.6766																																												1
A.P02259	4100	-78.434	-1.6766																																												1
A.P02260	4100	-78.434	-1.6766
A.P02261	4100	-78.434	-1.6766																																												1
A.P02262	4000	-78.434	-1.6766																																												1
A.P02263	4000	-78.434	-1.6766																																												1
A.P02264	4000	-78.434	-1.6766																																												1
A.P02265	3900	-78.434	-1.6766
A.P02266	3900	-78.434	-1.6766																																												1
A.P02267	3900	-78.434	-1.6766																																												1
A.P02268	3800	-78.443	-1.67662
A.P02269	3800	-78.443	-1.67662																																												1
A.P02270	3800	-78.443	-1.67662																																												1
A.P02271	4000	-79.1782	-2.89819																					1
A.P02272	4000	-79.1782	-2.89819																																												1
A.P02273	4000	-79.1782	-2.89819																					1
A.P02274	3900	-79.1782	-2.89819																					1
A.P02275	3900	-79.1782	-2.89819																					1
A.P02276	3900	-79.1782	-2.89819																					1
A.P02277	3800	-79.1692	-2.88914																																												1
A.P02278	3800	-79.1692	-2.88914																																												1
A.P02279	3800	-79.1692	-2.88914
A.P02280	3700	-79.1692	-2.8801
A.P02281	3700	-79.1692	-2.8801
A.P02282	3700	-79.1692	-2.8801
A.P02283	3600	-79.1692	-2.8801
A.P02284	3600	-79.1692	-2.8801
A.P02285	3600	-79.1692	-2.8801																																												1
A.P02286	3500	-79.1692	-2.87105																																											1
A.P02287	3500	-79.1692	-2.87105
A.P02288	3500	-79.1602	-2.87104																																											1
A.P02289	3400	-79.1602	-2.87104																																											1
A.P02290	3400	-79.1512	-2.87102																																							1				1
A.P02291	3400	-79.1512	-2.87102																																											1
A.P02292	3100	-79.1783	-2.79873
A.P02293	3100	-79.1783	-2.79873
A.P02294	3100	-79.1783	-2.79873
A.P02295	3500	-78.6744	-2.98766
A.P02296	3500	-78.6744	-2.98766
A.P02297	3500	-78.6744	-2.98766
A.P02298	3400	-78.6744	-2.98766
A.P02299	3400	-78.6744	-2.98766
A.P02300	3400	-78.6744	-2.98766
A.P02301	3200	-78.6744	-2.9967
A.P02302	3200	-78.6744	-2.9967
A.P02303	3200	-78.6744	-2.9967
A.P02304	3400	-79.0428	-3.16018
A.P02305	3400	-79.0428	-3.16018
A.P02306	3400	-79.0428	-3.16018																																												1
A.P02307	3300	-79.0338	-3.16016
A.P02308	3300	-79.0338	-3.16016																																												1
A.P02309	3300	-79.0338	-3.16016
A.P02310	3200	-79.0338	-3.16016																																												1
A.P02311	3200	-79.0338	-3.16016																																												1
A.P02312	3200	-79.0338	-3.16016																																								1
A.P02313	4400	-78.1927	-0.275629																1																								1
A.P02314	4400	-78.1927	-0.275629																1																								1
A.P02315	4400	-78.1927	-0.275629																																								1
A.P02316	4300	-78.1927	-0.275629																																								1
A.P02317	4300	-78.1927	-0.275629																																								1
A.P02318	4300	-78.1927	-0.275629			1																																					1
A.P02319	4200	-78.1927	-0.284665																																								1
A.P02320	4200	-78.1927	-0.284665																																								1
A.P02321	4200	-78.1927	-0.284665			1
A.P02322	4100	-78.2017	-0.293704																																								1
A.P02323	4100	-78.2017	-0.293704																																								1				1
A.P02324	4100	-78.2017	-0.293704
A.P02325	4000	-78.2017	-0.302741																																												1
A.P02326	4000	-78.2017	-0.302741																																												1
A.P02327	4000	-78.2107	-0.302743																																												1
A.P02328	3900	-78.2196	-0.302745																					1																							1
A.P02329	3900	-78.2196	-0.302745																																												1
A.P02330	3900	-78.2196	-0.302745																																												1
A.P02331	3800	-78.2286	-0.302748																					1																							1
A.P02332	3800	-78.2286	-0.302748																					1
A.P02333	3800	-78.2286	-0.302748																																												1
A.P02334	4200	-78.3363	0.366																1
A.P02335	4200	-78.3363	0.366																1																								1
A.P02336	4200	-78.3363	0.366																1																								1
A.P02337	4100	-78.3363	0.366																																												1
A.P02338	4100	-78.3363	0.366			1																																									1
A.P02339	4100	-78.3363	0.366																					1																							1
A.P02340	4000	-78.3363	0.366																																												1
A.P02341	4000	-78.3363	0.366
A.P02342	4000	-78.3363	0.366																																												1
A.P02343	3900	-78.3363	0.366
A.P02344	3900	-78.3363	0.366
A.P02345	3900	-78.3363	0.366
A.P02346	3800	-78.3274	0.365997
A.P02347	3800	-78.3274	0.365997
A.P02348	3800	-78.3274	0.365997
A.P02349	3700	-78.3274	0.365997
A.P02350	3700	-78.3274	0.365997																																												1
A.P02351	3700	-78.3274	0.365997
A.P02352	3600	-78.3184	0.365995
A.P02353	3600	-78.3184	0.365995																																												1
A.P02354	3600	-78.3184	0.365995																																												1
A.P02355	4200	-77.9421	0.808639																1																								1
A.P02356	4200	-77.9421	0.808639																1																								1
A.P02357	4200	-77.9421	0.808639																1
A.P02358	4100	-77.9421	0.799604																1																								1
A.P02359	4100	-77.9332	0.79961																																								1
A.P02360	4100	-77.9332	0.79961																																								1
A.P02361	4000	-77.9242	0.799616
A.P02362	4000	-77.9242	0.799616
A.P02363	4000	-77.9242	0.799616
A.P02364	3900	-77.9152	0.799623																																								1
A.P02365	3900	-77.9152	0.799623																																								1
A.P02366	3900	-77.9152	0.799623																																								1
A.P02367	3800	-77.9152	0.799623
A.P02368	3800	-77.9152	0.799623
A.P02369	3800	-77.9152	0.799623
A.P02370	3700	-77.9152	0.790587																																							1
A.P02371	3700	-77.9152	0.790587
A.P02372	3700	-77.9152	0.790587																																							1
A.P02373	3600	-77.9152	0.790587
A.P02374	3600	-77.9152	0.790587
A.P02375	3600	-77.9152	0.790587
A.P02376	4600	-78.8475	-1.44204																																								1
A.P02377	4600	-78.8475	-1.44204																																								1
A.P02378	4600	-78.8475	-1.44204
A.P02379	4500	-78.8475	-1.44204
A.P02380	4500	-78.8475	-1.44204																																												1
A.P02381	4500	-78.8475	-1.44204
A.P02382	4400	-78.8565	-1.44205																																												1
A.P02383	4400	-78.8565	-1.44205																					1																							1
A.P02384	4400	-78.8565	-1.44205																					1																							1
A.P02385	4300	-78.8655	-1.43302																					1
A.P02386	4300	-78.8655	-1.43302																																												1
A.P02387	4300	-78.8655	-1.43302
A.P02388	4200	-78.8655	-1.42398
A.P02389	4200	-78.8655	-1.42398
A.P02390	4200	-78.8655	-1.42398
A.P02391	4100	-78.8655	-1.42398																																												1
A.P02394	4000	-78.8655	-1.41494
A.P02395	4000	-78.8655	-1.41494
A.P02396	4000	-78.8655	-1.41494
A.P02397	4200	-78.5147	-1.83037
A.P02398	4200	-78.5147	-1.83037			1
A.P02399	4200	-78.5147	-1.83037
A.P02400	4100	-78.5237	-1.82134			1
A.P02401	4100	-78.5237	-1.82134
A.P02402	4100	-78.5237	-1.82134
A.P02403	4000	-78.5237	-1.82134
A.P02404	4000	-78.5237	-1.82134
A.P02405	4000	-78.5237	-1.82134			1
A.P02406	3900	-78.5327	-1.81231
A.P02407	3900	-78.5327	-1.81231
A.P02408	3900	-78.5327	-1.81231
A.P02409	3800	-78.5327	-1.81231
A.P02410	3800	-78.5327	-1.81231
A.P02411	3800	-78.5327	-1.81231
A.P02412	3700	-78.5327	-1.81231
A.P02413	3700	-78.5327	-1.81231
A.P02414	3700	-78.5327	-1.81231
A.P02415	4300	-78.4615	-1.26088
A.P02416	4300	-78.4615	-1.26088																					1
A.P02417	4300	-78.4615	-1.26088																					1
A.P02418	4200	-78.4526	-1.17048																1
A.P02419	4200	-78.4526	-1.17048																1
A.P02420	4200	-78.4526	-1.17048																1					1
A.P02421	4100	-78.4437	-1.08009
A.P02422	4100	-78.4437	-1.08009
A.P02423	4100	-78.4437	-1.08009
A.P02424	4000	-78.4437	-1.08009
A.P02425	4000	-78.4437	-1.08009
A.P02426	4000	-78.4437	-1.08009
A.P02427	3900	-78.4437	-1.08009																					1
A.P02428	3900	-78.4437	-1.08009																					1
A.P02429	3900	-78.4437	-1.08009
A.P02430	3800	-78.4347	-1.08009																					1
A.P02431	3800	-78.4347	-1.08009																					1
A.P02432	3800	-78.4347	-1.08009																					1
A.P02433	4030	-78.4437	-1.08009
A.P02434	4030	-78.4437	-1.08009
A.P02435	4030	-78.4437	-1.08009
A.P02574	4330	-78.1927	-0.320811																	1
A.P02575	3945	-78.2017	-0.347923							1
A.P02576	3940	-78.2017	-0.347923
A.P02577	3797	-78.2646	0.131018																																											1
A.P02578	3774	-78.2735	0.131019																																											1
A.P02579	3612	-77.978	0.709228
A.P02580	3628	-77.9869	0.709222
A.P02581	3778	-77.9869	0.709222																																								1
A.P02582	3650	-77.978	0.718263
A.P02583	3869	-78.4433	-1.45066																																												1
A.P02584	3888	-78.4433	-1.45066
A.P02585	3959	-78.4433	-1.45066
A.P02586	3966	-78.2107	-0.311779
A.P02587	4077	-78.2017	-0.32985																			1
A.P02588	4230	-78.2017	-0.320813																			1																					1
A.P02589	4276	-78.1927	-0.320811																																								1
A.P02590	3805	-78.9913	-1.39697										1
A.P02591	3807	-78.9913	-1.39697
A.P02592	3913	-78.9823	-1.37888																																														1
A.P02593	3944	-78.9733	-1.37887
A.P02594	4031	-79.0003	-1.36985
A.P02595	3990	-78.9913	-1.3608							1																																					1
A.P02597	3993	-78.8117	-1.34256
A.P02598	4556	-78.8654	-1.48727
A.P02599	4605	-78.8564	-1.48726
A.P02600	4851	-78.8475	-1.46917
A.P02601	4257	-78.9104	-1.43306																																												1
A.P02602	4271	-78.9104	-1.42402
A.P02603	4222	-78.9194	-1.43307
A.P02604	3982	-78.5429	-0.185318						1															1
A.P02605	3985	-78.5429	-0.185318
A.P02606	4019	-78.5429	-0.185318
A.P02607	4076	-78.5518	-0.176281
A.P02608	4125	-78.5518	-0.176281
A.P02609	4127	-78.5429	-0.176279
A.P02610	4139	-78.8474	-1.55957																																							1
A.P02611	3890	-78.8384	-1.54148														1												1
A.P02612	4389	-78.8744	-1.49632
A.P02613	4391	-78.8564	-1.4963																					1
A.P02614	4444	-78.8564	-1.50534
A.P02615	4425	-78.8474	-1.50533																					1
A.P02616	4331	-78.8474	-1.50533																					1																							1
A.P02617	4112	-78.8474	-1.51437																																														1
A.P02618	4004	-79.2323	-2.78072																																								1
A.P02619	4017	-79.2323	-2.78072																																								1
A.P02620	3984	-79.2323	-2.78072																																												1
A.P02621	3982	-79.2323	-2.78072
A.P02622	3962	-79.2233	-2.78071
A.P02624	3928	-79.2233	-2.78071
A.P02627	3943	-79.2233	-2.78071																																								1
A.P02628	3956	-79.2233	-2.77167																					1
A.P02630	3855	-79.2143	-2.77165
A.P02632	3747	-79.2053	-2.78068																																								1
A.P02633	3787	-78.6774	-0.655409													1
A.P02634	3826	-78.6774	-0.655409													1
A.P02635	3905	-78.6774	-0.655409
A.P02636	3948	-78.6864	-0.655414				1									1
A.P02637	3998	-78.6864	-0.655414													1
A.P02638	4025	-78.6864	-0.655414
A.P02640	3777	-78.6774	-0.655409
A.P02641	3787	-78.6595	-0.574044
A.P02642	3882	-78.6595	-0.565004
A.P02643	3792	-78.6595	-0.574044						1
A.P02644	3577	-78.6236	-0.519791													1																		1
A.P02645	3742	-78.6326	-0.519795									1
A.P02647	4406	-78.7846	-1.41486
A.P02648	4422	-78.7846	-1.41486
A.P02649	4430	-78.7846	-1.41486
A.P02650	4441	-78.7846	-1.41486
A.P02651	4439	-78.7846	-1.41486																																								1
A.P02652	4428	-78.7846	-1.41486
A.P02653	4412	-78.7936	-1.41487
A.P02654	3370	-78.9009	-1.92128													1																		1												1
A.P02656	3439	-78.9009	-1.92128
A.P02659	4187	-78.8562	-1.73136
A.P02660	4248	-78.8652	-1.72233
A.P02661	4267	-78.8652	-1.72233
A.P02662	4295	-78.8831	-1.74043
A.P02663	4042	-78.6229	-1.49605
A.P02664	4185	-78.6319	-1.49606
A.P02665	4245	-78.6319	-1.49606																				1																				1
A.P02666	4115	-78.6319	-1.49606
A.P02667	3888	-78.8383	-1.64093
A.P02669	3932	-78.8473	-1.64094
A.P02670	3762	-78.7745	-2.30985									1																																			1
A.P02672	3865	-78.7745	-2.31889									1												1
A.P02673	3872	-78.7745	-2.31889
A.P02674	3874	-78.7655	-2.31888																																												1
A.P02677	3728	-78.7745	-2.30985									1
A.P02678	3391	-79.3027	-3.71226																																											1
A.P02680	3477	-79.3117	-3.71228																																											1
A.P02681	3474	-79.3117	-3.71228																																											1
A.P02682	3466	-79.3117	-3.71228
A.P02683	3496	-79.3117	-3.71228																																											1
A.P02684	3586	-79.3117	-3.72132																																												1
A.P02685	3595	-79.3117	-3.72132
A.P02686	3879	-78.4799	-0.61012
A.P02687	3892	-78.4799	-0.61012													1																										1
A.P02690	4044	-78.4799	-0.601082													1
A.P02691	3999	-78.4799	-0.601082													1
A.P02694	3753	-78.9108	-0.872504				1					1																									1												1
A.P02696	3844	-78.9198	-0.863468									1																									1
A.P02698	3323	-70.8049	8.82962					1								1					1
A.P02699	3374	-70.8049	8.82962					1							1																			1													1
A.P02700	3396	-70.8049	8.82962
A.P02701	3412	-70.8049	8.82962					1													1																										1
A.P02702	3862	-70.8413	8.84752					1	1									1
A.P02703	3871	-70.8413	8.84752					1	1		1							1																													1
A.P02704	4304	-70.8505	8.8746																																												1
A.P02705	4316	-70.8505	8.8746																																												1
A.P02706	4328	-70.8505	8.8746								1
A.P02707	4330	-70.8505	8.8746								1							1
A.P02708	4247	-70.8414	8.8656					1			1							1																								1					1
A.P02709	4285	-70.8414	8.8656					1			1							1																													1
A.P02710	4250	-70.8414	8.8656																																												1
A.P02711	3125	-71.0589	8.75599					1													1
A.P02712	3167	-71.0589	8.75599					1	1
A.P02713	3231	-71.0589	8.75599					1
A.P02714	3277	-71.0589	8.75599																		1
A.P02715	3330	-71.0589	8.75599													1
A.P02716	3296	-71.0589	8.75599					1						1
A.P02717	3220	-71.9707	8.0182					1																							1
A.P02718	3225	-71.9707	8.0182					1																							1							1
A.P02719	3233	-71.9707	8.0182					1																							1
A.P02720	3275	-71.9708	8.02723					1
A.P02721	3300	-71.9708	8.02723					1
A.P02722	3329	-71.9617	8.02729					1																																								1
A.P02723	3273	-71.9708	8.02723
A.P02724	3227	-71.0498	8.75604						1												1																		1									1
A.P02725	3257	-71.0498	8.75604					1	1												1																											1
A.P02726	3296	-71.0498	8.75604
A.P02727	3312	-71.0498	8.75604					1	1
A.P02728	3335	-71.0498	8.75604					1																															1
A.P02734	3850	-70.8595	8.84743						1
A.P02735	3897	-70.8686	8.84739						1																																						1
A.P02736	3966	-70.8686	8.84739																																												1
A.P02737	3987	-70.8686	8.84739																																												1
A.P02738	3880	-70.8595	8.85647					1
A.P02739	3890	-70.8595	8.85647					1	1
A.P02740	3893	-70.8595	8.85647						1
A.P02741	3517	-70.8138	8.79341					1	1
A.P02742	3450	-70.8138	8.79341						1
A.P02743	3473	-70.8137	8.78437
A.P02744	3446	-70.8138	8.79341						1
A.P02746	3462	-70.8047	8.79346					1
A.P02747	3491	-70.8047	8.79346																															1
A.P02748	3466	-70.8047	8.79346																															1
A.P02749	3496	-70.5694	9.03864								1							1																														1
A.P02750	3500	-70.5694	9.03864																																													1
A.P02751	3762	-70.5785	9.02956					1			1							1																														1
A.P02752	3775	-70.5785	9.02956					1										1																													1	1
A.P02753	3766	-70.5876	9.02952					1	1									1																											1			1
A.P02754	3692	-70.5966	9.02044					1	1																																					1
A.P02756	3443	-70.5239	9.02979																																										1
A.P02757	3378	-70.5239	9.02075					1							1
A.P02758	3383	-70.5239	9.02075
A.P02759	3394	-70.5239	9.02979																																													1
A.P02760	3419	-70.5239	9.02979					1										1																											1
A.P02761	3247	-70.5148	9.03887					1										1																											1
A.P02762	3441	-70.4696	9.10235					1										1																													1
A.P02763	3446	-70.4696	9.10235																																												1
A.P02765	3332	-70.4696	9.09331					1								1																														1
A.P02782	3450	-71.0126	8.58448					1	1						1
A.P02787	3120	-72.0842	7.95541
A.P02791	3076	-71.3017	8.33883
A.P02792	3127	-71.3017	8.32979																														1											1
A.P02793	3129	-71.3108	8.32974					1
A.P02794	3139	-71.3107	8.3207					1
A.P02797	3262	-79.5245	-5.34054							1		1																	1													1				1	1
A.P02798	3276	-79.5245	-5.34054													1													1
A.P02799	3290	-79.5245	-5.34054
A.P02801	3255	-79.5245	-5.34054
A.P02802	3243	-79.5245	-5.34054
A.P02809	3530	-79.4981	-5.06013																																1
A.P02810	3460	-79.516	-5.0873															1																	1												1
A.P02811	3475	-79.516	-5.0873															1
A.P02812	3558	-79.498	-5.0963																																												1
A.P02813	3567	-79.4799	-5.11435																																												1
A.P02814	3509	-79.4799	-5.11435							1																								1												1
A.P02822	3506	-79.4267	-4.74345																																							1
A.P02823	3468	-79.4267	-4.74345
A.P02825	3433	-79.4267	-4.7344																																											1
A.P02828	3425	-79.4357	-4.72538																									1
A.P02829	3377	-79.4357	-4.72538																									1
A.P02830	3373	-79.4357	-4.72538													1
A.P02831	3363	-79.4357	-4.72538
A.P02846	2925	-79.2982	-5.60219																		1															1
A.P02847	2945	-79.2982	-5.60219										1															1
A.P02850	3024	-79.2801	-5.60214
A.P02852	3108	-79.2801	-5.60214									1
A.P02853	3101	-79.2801	-5.60214
[truncated: 1,123 more columns]
